# Supplementary material for: Copy Number Variation of the SHE Gene in Sheep and Its Association with Economic Traits
Source: PubMed Central journal article supplement (PMC6720781; doi:10.3390/ani9080531), 2019-08-06
Supplement: animals-09-00531-s001.pdf [file animals-09-00531-s001.pdf]

**Table S1.** Association of *SHE* gene CNV with growth traits in four sheep breeds.

| Breed            | Growth Traits                     | CNV Type (Mean $\pm$ SE) |                  |                  | <i>p</i> |
|------------------|-----------------------------------|--------------------------|------------------|------------------|----------|
|                  |                                   | Loss                     | Normal           | Gain             |          |
| CKS              | body height (cm)                  | 66.16 $\pm$ 0.97         | 66.84 $\pm$ 0.96 | 66.62 $\pm$ 0.96 | 0.491    |
|                  | heart girth (cm)                  | 90.00 $\pm$ 1.93         | 90.03 $\pm$ 1.92 | 89.22 $\pm$ 1.92 | 0.676    |
|                  | body weight (kg)                  | 54.33 $\pm$ 2.91         | 56.51 $\pm$ 2.88 | 54.61 $\pm$ 2.89 | 0.367    |
| HS               | body height (cm)                  | 61.63 $\pm$ 0.30         | 62.32 $\pm$ 0.77 | 62.50 $\pm$ 0.75 | 0.452    |
|                  | rump width (cm)                   | 17.36 $\pm$ 0.09         | 17.50 $\pm$ 0.23 | 17.72 $\pm$ 0.23 | 0.354    |
|                  | body slanting length (cm)         | 70.88 $\pm$ 0.31         | 70.83 $\pm$ 0.77 | 70.12 $\pm$ 0.77 | 0.658    |
|                  | body weight (kg)                  | 32.01 $\pm$ 0.37         | 32.92 $\pm$ 0.92 | 33.17 $\pm$ 0.92 | 0.388    |
| STHS             | body slanting length (cm)         | 58.78 $\pm$ 0.77         | 58.85 $\pm$ 0.87 | 59.24 $\pm$ 0.75 | 0.900    |
|                  | body height (cm)                  | 62.64 $\pm$ 0.53         | 63.04 $\pm$ 0.60 | 64.01 $\pm$ 0.52 | 0.164    |
|                  | heart girth (cm)                  | 71.16 $\pm$ 0.75         | 72.10 $\pm$ 0.85 | 72.81 $\pm$ 0.73 | 0.286    |
|                  | Circumference of cannon bone (cm) | 7.16 $\pm$ 0.09          | 6.98 $\pm$ 0.10  | 7.12 $\pm$ 0.08  | 0.433    |
| LTHS             | chest depth (cm)                  | 27.61 $\pm$ 0.33         | 27.77 $\pm$ 0.37 | 27.48 $\pm$ 0.32 | 0.850    |
|                  | body slanting length (cm)         | 76.51 $\pm$ 2.87         | 76.96 $\pm$ 1.71 | 77.00 $\pm$ 2.19 | 0.990    |
|                  | chest width (cm)                  | 21.69 $\pm$ 1.16         | 22.58 $\pm$ 0.69 | 22.99 $\pm$ 0.82 | 0.690    |
|                  | body height (cm)                  | 76.84 $\pm$ 2.64         | 78.33 $\pm$ 1.58 | 75.86 $\pm$ 2.02 | 0.573    |
|                  | heart girth (cm)                  | 90.23 $\pm$ 3.09         | 94.95 $\pm$ 1.71 | 98.56 $\pm$ 2.26 | 0.123    |
|                  | circumference of cannon bone (cm) | 8.01 $\pm$ 0.35          | 7.92 $\pm$ 0.21  | 7.44 $\pm$ 0.27  | 0.287    |
|                  | chest depth (cm)                  | 37.05 $\pm$ 2.14         | 35.03 $\pm$ 1.77 | 35.01 $\pm$ 1.60 | 0.697    |
|                  | high at the cross (cm)            | 76.39 $\pm$ 7.02         | 82.80 $\pm$ 4.19 | 90.68 $\pm$ 5.37 | 0.258    |
| body weight (kg) | 50.16 $\pm$ 5.94                  | 55.83 $\pm$ 3.42         | 58.12 $\pm$ 4.22 | 0.590            |          |

CKS: loss (169), normal (86), gain (47). HS: loss (150), normal (24), gain (24). STHS: loss (65), normal (54), gain (70). LTHS: loss (6), normal (30), gain (25).

**Table S2.** The phenotypic variance explained by the CNV of *SHE* gene.

| Breeds | Growth Traits                     | R2     | Percentage |
|--------|-----------------------------------|--------|------------|
| CKS    | body length (cm)                  | 0.0004 | 0.04%      |
| HS     | circumference of cannon bone (cm) | 0.0240 | 2.40%      |
|        | heart girth (cm)                  | 0.0390 | 3.90%      |
| STHS   | chest width (cm)                  | 0.0004 | 0.04%      |
|        | high at the cross (cm)            | 0.0388 | 3.88%      |

CKS: loss (169), normal (86), gain (47). HS: loss (150), normal (24), gain (24). STHS: loss (65), normal (54), gain (70).

**Table S3.** The additive and dominance effect of the *SHE* gene CNV.

| Breeds | Growth Traits (cm)           | Type   | Additive Effect Value | Dominant Effect Value |
|--------|------------------------------|--------|-----------------------|-----------------------|
| CKS    | body length                  | Loss   | -0.92                 | -0.31                 |
|        |                              | Normal | 0.61                  | 0.72                  |
|        |                              | Gain   | 2.14                  | -1.69                 |
| HS     | circumference of cannon bone | Loss   | -0.16                 | 0.08                  |
|        |                              | Normal | 0.28                  | -0.35                 |
|        |                              | Gain   | 0.72                  | 1.58                  |
| STHS   | chest width                  | Loss   | -0.08                 | -0.01                 |
|        |                              | Normal | 0.14                  | 0.04                  |
|        |                              | Gain   | 0.36                  | -0.16                 |
| STHS   | high at the cross            | Loss   | 0.54                  | -0.62                 |
|        |                              | Normal | 0.02                  | 0.58                  |
|        |                              | Gain   | -0.51                 | -0.55                 |
| STHS   | high at the cross            | Loss   | -1.14                 | 0.60                  |
|        |                              | Normal | -0.55                 | -0.56                 |
|        |                              | Gain   | 1.07                  | 0.52                  |

CKS: loss (169), normal (86), gain (47). HS: loss (150), normal (24), gain (24). STHS: loss (65), normal (54), gain (70).
